# Supplementary material for: Nicotinic acid additive with a double regulating mechanism for high-performance aqueous zinc ion batteries
Source: Royal Society of Chemistry journal article supplement (doi:10.1039/d3ta07462e), 2024-01-01
Supplement: d3ta07462e1.pdf [file d3ta07462e1.pdf]

1 **Supporting Information for :**  
2 **Nicotinic Acid Additive with the Double Regulating**  
3 **Mechanism for High-Performance Aqueous Zinc Ion**  
4 **Batteries**

5 Hongzhi Wang<sup>a</sup>, Huanhuan Wang<sup>a</sup>, Weiguo Zhang<sup>\*a</sup>, Leshan Yan<sup>a</sup>, Suwei Yao<sup>a</sup>  
6

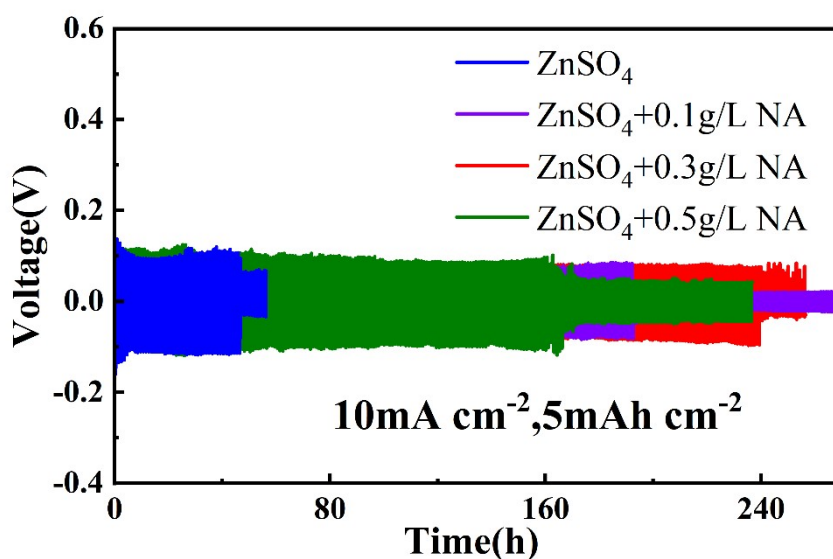

8 **Figure S1.** Long-term galvanostatic cycling performance of Zn||Zn symmetrical cells in electrolytes  
9 with different concentrations of NA.

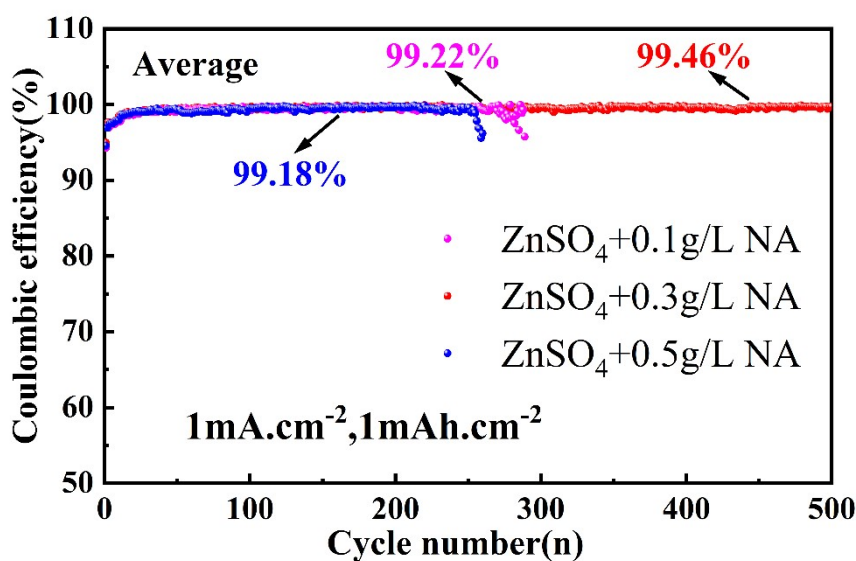

11 **Figure S2.** Coulombic efficiencies of Zn||Ti asymmetric cells in electrolytes with different  
12 concentrations of NA.

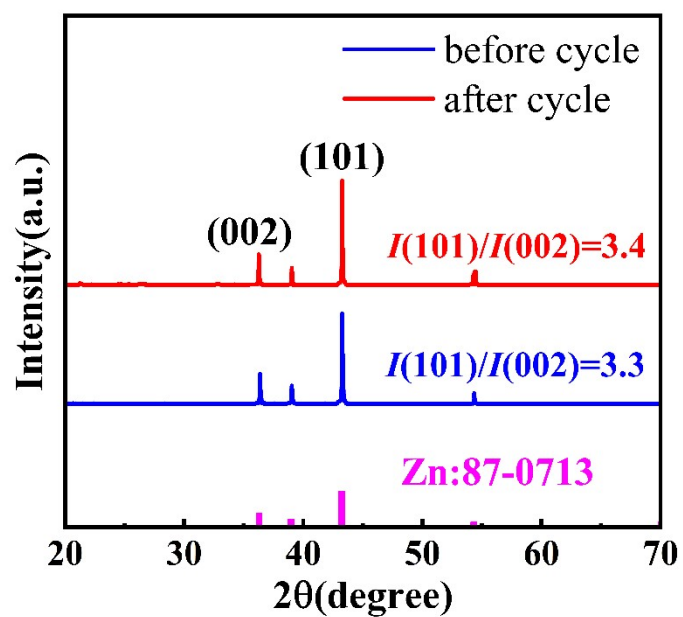

1  
 2 **Figure S3.** Zn||Zn symmetric cells with ZnSO<sub>4</sub>+NA electrolytes XRD of zinc anode surface before  
 3 and after 50 cycles.  
 4

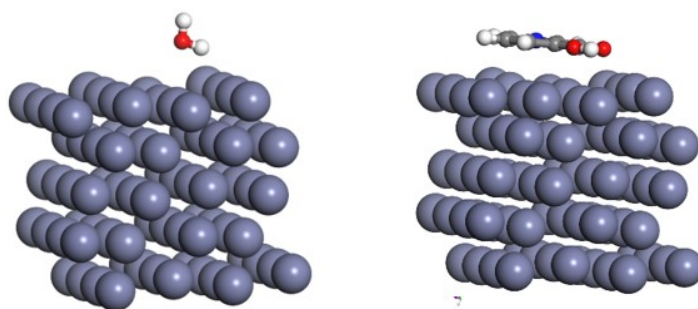

5  
 6 **Figure S4.** The corresponding absorbed models for different situations(101).  
 7

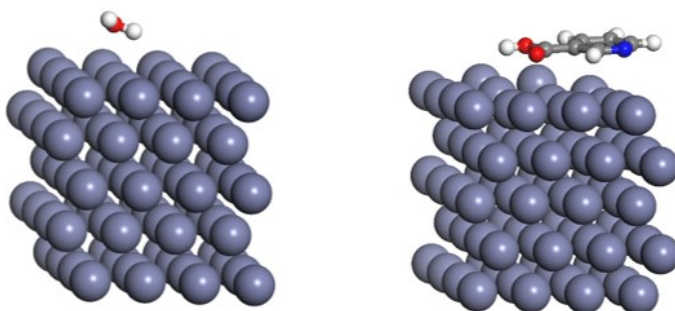

8  
 9 **Figure S5.** The corresponding absorbed models for different situations(002).

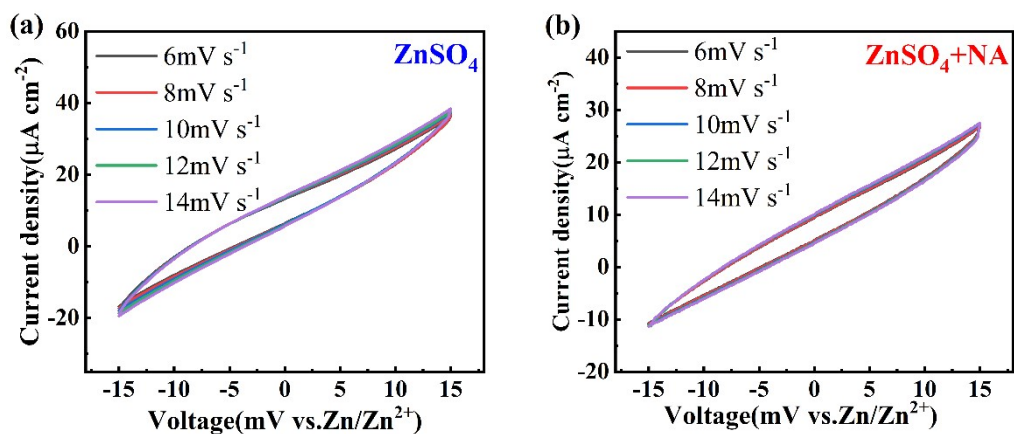

1  
 2 **Figure S6.** Cyclic voltammogram curves for Zn||Zn symmetric cells with (a) ZnSO<sub>4</sub> electrolytes  
 3 and (b) ZnSO<sub>4</sub>+NA electrolytes.  
 4

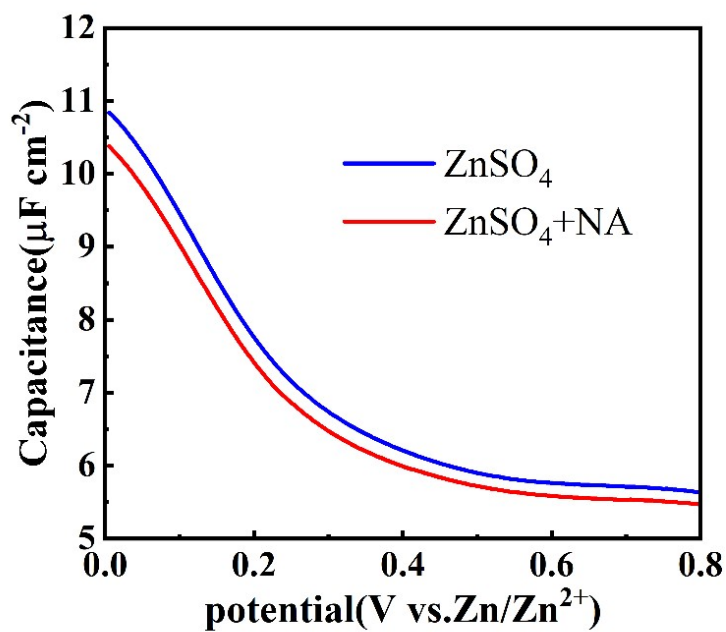

5  
 6 **Figure S7.** The alternating current voltammetry(ACV) measurement for Zn||Ti  
 7 asymmetric cells in electrolytes with/without NA.  
 8

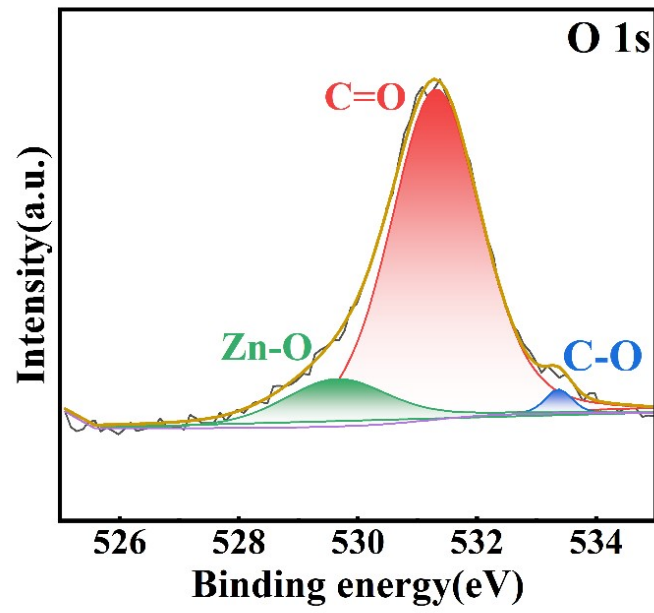

1

2 **Figure S8.** O 1s spectra after 10 cycles at  $1.0 \text{ mA cm}^{-2}$  ( $1.0 \text{ mAh cm}^{-2}$ ) for  $\text{ZnSO}_4$ +NA electrolytes.

3

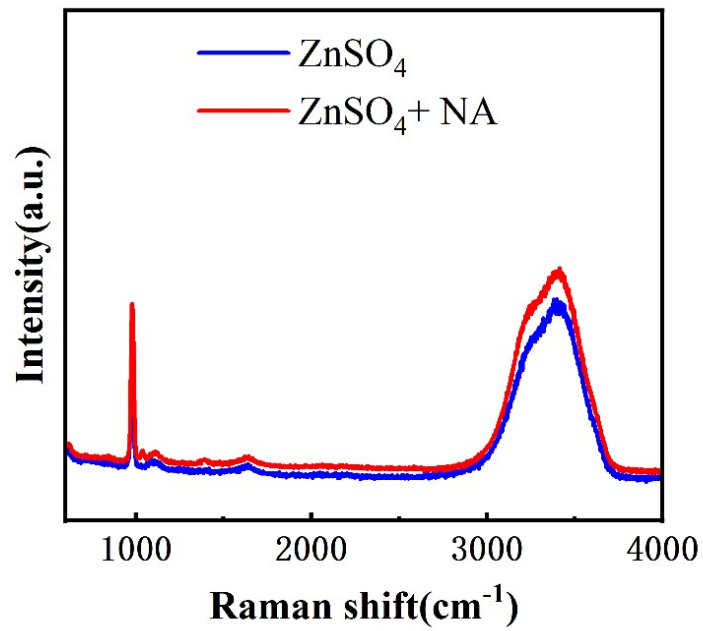

4

5 **Figure S9.** The Raman spectra of the electrolytes with/without NA.

6

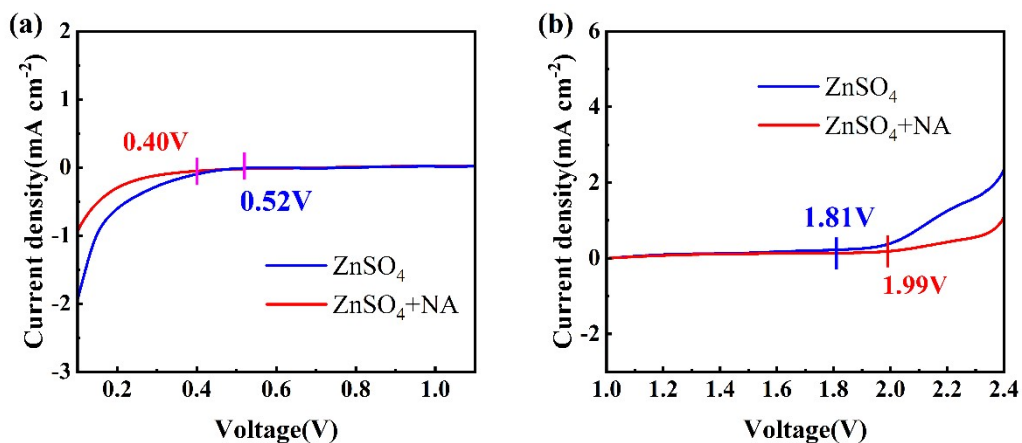

1  
2 **Figure S10.** LSV curves of Zn anode presenting (a) HER and (b) OER in  $\text{ZnSO}_4$  electrolytes  
3 with/without NA

4

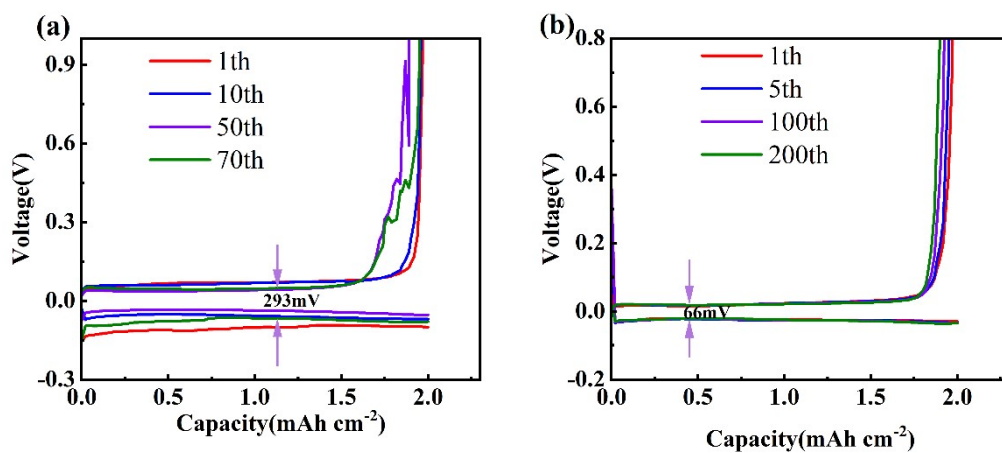

5

6 **Figure S11.** Corresponding GCD curves of the Zn||Ti cells at various cycles with (a)  $\text{ZnSO}_4$   
7 electrolytes and (b)  $\text{ZnSO}_4+\text{NA}$  electrolytes.

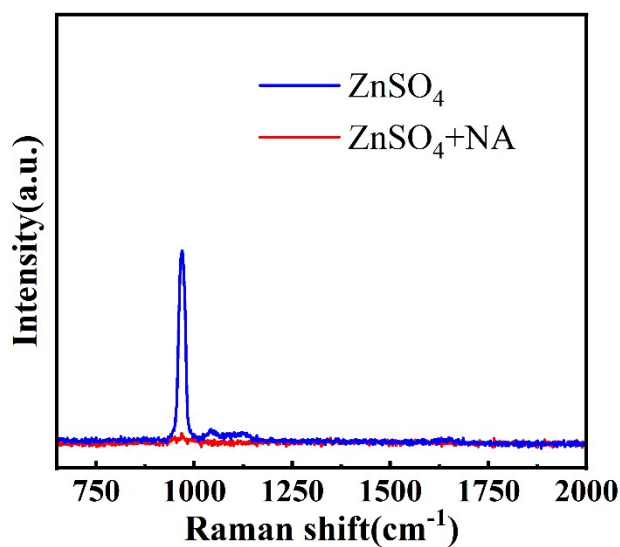

8

9 **Figure S12.** The Raman spectra of Zn deposits on Ti substrate in electrolytes with/without NA.

1

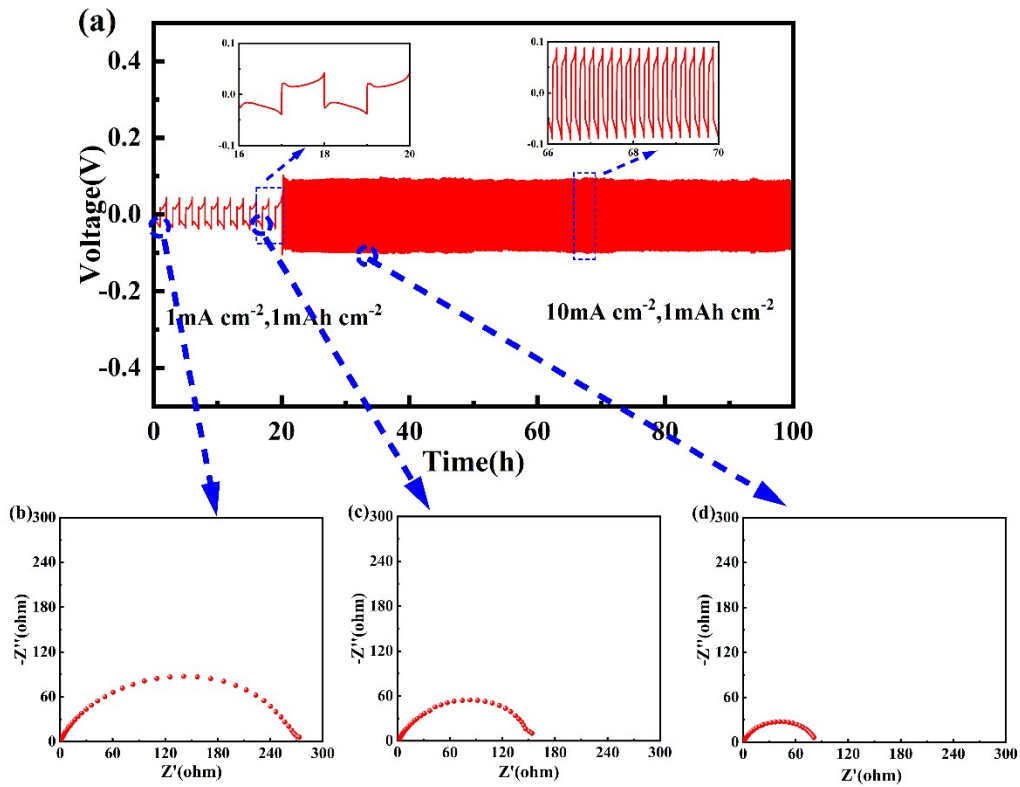

2

3 **Figure S13.** (a) The voltage profile of pre-cycles ( $\text{ZnSO}_4+\text{NA}$ ) at  $1 \text{ mA cm}^{-2}$  ( $1 \text{ mAh cm}^{-2}$ ) followed  
 4 by  $10 \text{ mA cm}^{-2}$  ( $1 \text{ mAh cm}^{-2}$ ), insets show the amplified profile at different cycles. The  
 5 corresponding impedance spectra of the positions in (a): (b) before test, (c) after 16 h at  $1 \text{ mA cm}^{-2}$   
 6 ( $1 \text{ mAh cm}^{-2}$ ), (d) after 15 h at  $10 \text{ mA cm}^{-2}$  ( $1 \text{ mA h cm}^{-2}$ ).

7

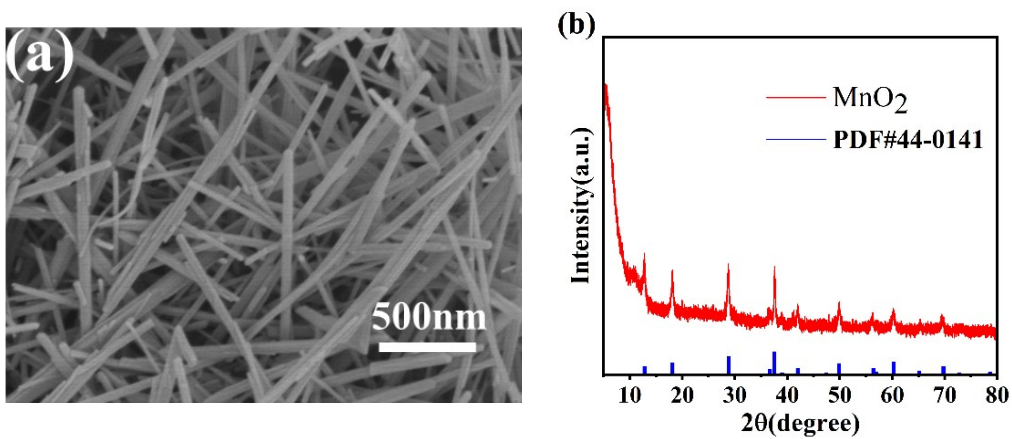

8

9 **Figure S14.** nanowire  $\text{MnO}_2$  (a)SEM and (b)XRD.

10

1

2 **Table S1.** Calculated energies of different solvation species obtained from DFT calculations.

|                       | $E_Z(\text{Hartree})$ | $E_S(\text{Hartree})$ | $E_C(\text{Hartree})$ | $E_B(\text{Hartree})$ | $E_B(\text{kcal/mol})$ |
|-----------------------|-----------------------|-----------------------|-----------------------|-----------------------|------------------------|
| <b>H<sub>2</sub>O</b> | -1819.788673          | -80.456587            | -1900.40954           | -0.16428              | -103.0873428           |
| <b>NA</b>             | -1819.788673          | -462.579237           | -2282.645045          | -0.277134             | -173.90436             |

3

4

5 **Table S2.** Fitting results for Zn||Zn symmetric cells at different temperatures.

| <b>Symmetrical cells</b>               | <b>Res</b>      | <b>298.15</b> | <b>303.15</b> | <b>308.15</b> | <b>313.15</b> |
|----------------------------------------|-----------------|---------------|---------------|---------------|---------------|
| <b>ZnSO<sub>4</sub> electrolyte</b>    | Rct( $\Omega$ ) | 1152          | 860           | 635.4         | 471.96        |
| <b>ZnSO<sub>4</sub>+NA electrolyte</b> | Rct( $\Omega$ ) | 263.3         | 224           | 191           | 162           |

6

7 **Table S3.** Performance comparison of Zn symmetric cell using ZnSO<sub>4</sub>+NA electrolyte with other  
8 reported literatures.

| <b>No.</b> | <b>Electrolyte</b>                                    | <b>Current density (mA cm<sup>-2</sup>)</b> | <b>Capacity (mAh cm<sup>-2</sup>)</b> | <b>Cycle time (hour)</b> | <b>Ref.</b> |
|------------|-------------------------------------------------------|---------------------------------------------|---------------------------------------|--------------------------|-------------|
| <b>1</b>   | ZnSO <sub>4</sub> +NA                                 | 1                                           | 1                                     | 5200                     | This work   |
|            |                                                       | 2                                           | 2                                     | 1650                     |             |
|            |                                                       | 5                                           | 2.5                                   | 1500                     |             |
|            |                                                       | 5                                           | 5                                     | 450                      |             |
| <b>2</b>   | ZnSO <sub>4</sub> +SL                                 | 0.5                                         | 0.5                                   | 600                      | 1           |
| <b>3</b>   | ZnSO <sub>4</sub> +Urea                               | 1                                           | 1                                     | 700                      | 2           |
| <b>4</b>   | ZnSO <sub>4</sub> +TBA <sup>+</sup>                   | 2                                           | 2                                     | 300                      | 3           |
| <b>5</b>   | ZnSO <sub>4</sub> +CH <sub>3</sub> COONH <sub>4</sub> | 2                                           | 1                                     | 2400                     | 4           |
| <b>6</b>   | Zn(OTF) <sub>2</sub> +TMS                             | 5                                           | 5                                     | 300                      | 5           |
| <b>7</b>   | ZnSO <sub>4</sub> +GO                                 | 1                                           | 0.5                                   | 650                      | 6           |
| <b>8</b>   | ZnSO <sub>4</sub> +HTCN-x                             | 1                                           | 1                                     | 1000                     | 7           |
| <b>9</b>   | ZnSO <sub>4</sub> +NMP                                | 1                                           | 1                                     | 540                      | 8           |
| <b>10</b>  | ZnSO <sub>4</sub> +PVDF                               | 0.25                                        | 0.05                                  | 2000                     | 9           |
| <b>11</b>  | ZnSO <sub>4</sub> +h-BN@PDA                           | 0.5                                         | 0.5                                   | 1700                     | 10          |
| <b>12</b>  | ZnSO <sub>4</sub> +LAA                                | 1                                           | 1                                     | 1200                     | 11          |
| <b>13</b>  | ZnSO <sub>4</sub> + AQS                               | 5                                           | 0.5                                   | 1200                     | 12          |
| <b>14</b>  | ZnSO <sub>4</sub> + NH <sub>3</sub> ·H <sub>2</sub> O | 5                                           | 5                                     | 250                      | 13          |
| <b>15</b>  | ZnSO <sub>4</sub> + TA-Na                             | 0.5                                         | 0.25                                  | 1700                     | 14          |
| <b>16</b>  | ZnSO <sub>4</sub> +GA                                 | 1                                           | 1                                     | 2500                     | 15          |

9

10 **References**

- 11 1. W. Zhou, M. Chen, Q. Tian, J. Chen, X. Xu, X. Han and J. Xu, *J Colloid*  
12 *Interface Sci.*, 2021, **601**, 486-494.

- 1 2. Z. Hou, M. Dong, Y. Xiong, X. Zhang, H. Ao, M. Liu, Y. Zhu and Y. Qian,  
2 *Small*, 2020, **16**, e2001228.
- 3 3. A. Bayaguud, X. Luo, Y. Fu and C. Zhu, *ACS Energy Lett.*, 2020, **5**, 3012-3020.
- 4 4. C. Lin, X. Yang, P. Xiong, H. Lin, L. He, Q. Yao, M. Wei, Q. Qian, Q. Chen and  
5 L. Zeng, *Adv Sci (Weinh)*, 2022, **9**, e2201433.
- 6 5. X. Zhao, X. Zhang, N. Dong, M. Yan, F. Zhang, K. Mochizuki and H. Pan,  
7 *Small*, 2022, **18**, e2200742.
- 8 6. J. Abdulla, J. Cao, D. Zhang, X. Zhang, C. Sriprachuabwong, S. Kheawhom, P.  
9 Wangyao and J. Qin, *ACS Applied Energy Mater.*, 2021, **4**, 4602-4609.
- 10 7. R. Wang, L. Liu, S. Huang, Y. Wu, X. Chen, Z. Liang and J. Xu, *J Colloid*  
11 *Interface Sci*, 2023, **646**, 950-958.
- 12 8. T. C. Li, Y. Lim, X. L. Li, S. Luo, C. Lin, D. Fang, S. Xia, Y. Wang and H. Y.  
13 Yang, *Adv. Energy Mater.*, 2022, **12**, 2103231.
- 14 9. L. T. Hieu, S. So, I. T. Kim and J. Hur, *Chem. Eng. J.*, 2021, **411**, 128584.
- 15 10. K. Su, J. Chen, X. Zhang, J. Feng, Y. Xu, Y. Pu, C. Wang, P. Ma, Y. Wang and  
16 J. Lang, *J. Power Sources*, 2022, **548**, 232074.
- 17 11. D. Zhang, J. Cao, R. Chanajaree, C. Yang, H. Chen, X. Zhang and J. Qin, *ACS*  
18 *Appl Mater Interfaces*, 2023, **15**, 11940-11948.
- 19 12. R. Sun, D. Han, C. Cui, Z. Han, X. Guo, B. Zhang, Y. Guo, Y. Liu, Z. Weng and  
20 Q. H. Yang, *Angew Chem Int Ed Engl*, 2023, **62**, e202303557.
- 21 13. R. Chen, W. Zhang, Q. Huang, C. Guan, W. Zong, Y. Dai, Z. Du, Z. Zhang, J. Li,  
22 F. Guo, X. Gao, H. Dong, J. Zhu, X. Wang and G. He, *Nano-Micro Lett.*  
23 2023,**15**, 81.
- 24 14. J. Wan, R. Wang, Z. Liu, L. Zhang, F. Liang, T. Zhou, S. Zhang, L. Zhang, Q.  
25 Lu, C. Zhang and Z. Guo, *ACS Nano* 2023, **17**, 2, 1610-1621.
- 26 15. H. Zheng, Y. Huang, J. Xiao, W. Zeng, X. Li, X. Li, M. Wang and Y. Lin, *Chem.*  
27 *Eng. J.*, 2023, **468**,143834.
